1 **1 Archaeal community structure and underlying ecological processes in swine manure**  
2  
3 **2 slurry**

4  
5  
6 **3 Priyanka Kumari<sup>1\*</sup> and Hong L. Choi<sup>1</sup>**  
7

8  
9  
10  
11 **5 <sup>1</sup> Department of Agricultural Biotechnology, Research Institute for Agriculture and Life**  
12  
13 **6 Science, Seoul National University, Gwanak, Seoul, 151-921, Republic of Korea**  
14  
15

16  
17  
18 **8 \* Corresponding author**  
19

20  
21 **9 Email: [priyanka.shahi1983@gmail.com](mailto:priyanka.shahi1983@gmail.com)**  
22

23 **10**  
24  
25  
26  
27  
28  
29  
30  
31  
32  
33  
34  
35  
36  
37  
38  
39  
40  
41  
42  
43  
44  
45  
46  
47  
48  
49  
50  
51  
52  
53  
54  
55  
56  
57  
58  
59  
60  
61  
62  
63  
64  
65

1  
2  
3  
4  
5 11 **Abstract**  
6

7 12 The ecological processes underlying the observed patterns in community composition of archaea  
8  
9  
10 13 in swine manure slurry are poorly understood. We studied the archaeal communities from six  
11  
12  
13 14 swine manure slurry storage tanks using paired-end Illumina sequencing of the v3 hypervariable  
14  
15 15 region of 16S rRNA gene. Across all samples, the archaeal community was dominated by  
16  
17 16 methanogens related to *Thermoplasmata*, *Methanomicrobia*, and *Methanobacteria* classes. At  
18  
19  
20 17 the genus level, the archaeal community was dominated by a single uncultured lineage of  
21  
22 18 archaea, *vadinCA11*, followed by methanogenic genera *Methanobrevibacter*, *Methanosarcina*,  
23  
24 19 *Methanosphaera*, *Methanogenium*, *Methanocorpusculum*, *Methanoculleus*, and  
25  
26  
27 20 *Methanomicrococcus*. Significant phylogenetic signals were detected across relatively short  
28  
29  
30 21 phylogenetic distances, indicating that closely related archaeal operational taxonomic units  
31  
32 22 (OTUs) tend to have similar niches. The standardized effect sizes of mean nearest taxon distance  
33  
34 23 (SES.MNTD) showed that archaeal community was phylogenetically clustered, suggesting that  
35  
36  
37 24 environmental filtering deterministically influence the within-community composition of  
38  
39 25 archaea. However, between-community analysis based on  $\beta$ -nearest taxon index ( $\beta$ NTI) revealed  
40  
41  
42 26 that both deterministic selection and stochastic processes operate simultaneously to govern the  
43  
44 27 assembly of archaeal communities. These findings significantly enhance our understanding of  
45  
46  
47 28 archaeal community assembly and underlying ecological processes in swine manure slurry.  
48

49  
50  
51 30 **Keywords:** archaea; Illumina sequencing; methanogens; phylogenetic signal; swine manure  
52  
53  
54 31 slurry  
55  
56  
57  
58  
59  
60  
61  
62  
63  
64  
65

1  
2  
3  
4  
5  
6  
7  
8  
9  
10  
11  
12  
13  
14  
15  
16  
17  
18  
19  
20  
21  
22  
23  
24  
25  
26  
27  
28  
29  
30  
31  
32  
33  
34  
35  
36  
37  
38  
39  
40  
41  
42  
43  
44  
45  
46  
47  
48  
49  
50  
51  
52  
53  
54  
55  
56  
57  
58  
59  
60  
61  
62  
63  
64  
65

**32 Introduction**

33 Archaea constitute a small fraction of the microbial biomass on Earth, however they involved in  
34 various essential ecological processes including nitrification, denitrification and methanogenesis  
35 (Offre et al. 2013). Originally, it was believed that archaea inhabit only under extreme conditions,  
36 however, now they are known to be present in wide variety of ecosystems including soil (Bintrim  
37 et al. 1997; Bates et al. 2011; Tripathi et al. 2013), marine and fresh-water habitats (Lipp et al.  
38 2008; Lliros et al. 2008; Teske and Sørensen 2008; Auguet et al. 2011), animal feces and stored  
39 manure (Mao et al. 2011; Barret et al. 2015), and intestinal tracts of animals (Shin et al. 2004;  
40 Pei et al. 2010). Culture-independent high-throughput sequencing methods have significantly  
41 improved our understanding of the diversity and composition of archaea across various  
42 ecosystems (Auguet et al. 2010). However, comparatively little is known about the ecological  
43 processes that shape the assembly of archaeal communities.

45 The assembly of microbial communities is influenced by two types of ecological processes-  
46 deterministic selection and stochastic processes (Stegen et al. 2012; Wang et al. 2013).  
47 Traditionally, the assembly of microbial communities has been thought to be influenced  
48 primarily by deterministic selection (Baas-Becking 1934; Torsvik et al. 2002), in which certain  
49 abiotic and biotic factors select a particular assemblage of microbial species (Fierer and Jackson  
50 2006; Lozupone and Knight 2007). However, some studies have reported that stochastic  
51 processes (e.g., random birth, death, dispersal, and colonization) can also play a major role in  
52 shaping assembly of microbial communities (Peay et al. 2010; Caruso et al. 2011). More recently,  
53 it has been found that both deterministic and stochastic processes can act concurrently to

1  
2  
3  
4  
5 54 influence the community assembly of microbial communities (Chase and Myers 2011;  
6  
7  
8 55 Langenheder and Székely 2011; Stegen et al. 2012; Zhou et al. 2014).  
9

10 56  
11  
12 57 Modern swine production facilities are more intensified and generate large quantities of manure  
13  
14  
15 58 slurry (Barker and Overcash 2007). The swine manure slurry is commonly stored in deep pits for  
16  
17  
18 59 months before being applied to agricultural lands as fertilizer. During storage the swine manure  
19  
20 60 slurry decomposes, and emits a considerable quantity of methane (EPA 2013), which is  
21  
22 61 exclusively generated by methanogenic archaea (Whitman et al. 2006). Over the past decade,  
23  
24  
25 62 several studies have characterized the archaeal community present in swine feces and stored  
26  
27 63 manure slurry by using both cultivation-based (Miller et al. 1986) and culture-independent  
28  
29  
30 64 methods (Whitehead and Cotta 1999; Mao et al. 2011; Da Silva et al. 2014). However, it is still  
31  
32 65 not clear what underlying ecological processes are important in structuring the community  
33  
34  
35 66 composition of archaea in swine manure slurry.  
36

37 67  
38  
39 68 Therefore, this study was conducted to answer the following questions:  
40

- 41  
42 69 1) What are the dominant archaeal taxa present in swine manure slurry?  
43  
44 70 2) How does the community composition of archaea is governed by the underlying  
45  
46  
47 71 ecological processes (deterministic vs. stochastic) in both within- and between-  
48  
49 72 community-level analyses?  
50

51 73  
52  
53  
54 74 We applied an ecological null modeling approach to understand the relative influence of  
55  
56 75 deterministic selection and stochastic processes in structuring the archaeal communities (Webb  
57  
58  
59 76 et al. 2002; Stegen et al. 2012).  
60

1  
2  
3  
4  
5 **77 Material and Methods**

6  
7  
8 **78 Sample collection**

9  
10 79 Swine manure slurry samples were collected from six different commercial pig farms in South  
11  
12 80 Korea in June 2013. For each sample, slurry was collected from the top 1 m of the storage tank at  
13  
14  
15 81 five different points, and finally one liter of slurry was collected after through mixing (for  
16  
17 82 detailed information on sampling, see (Kumari et al. 2015). After collection the swine manure  
18  
19  
20 83 slurry samples were kept in an ice box and transported to the laboratory for DNA extraction.  
21

22 84  
23  
24  
25 **85 DNA extraction, PCR amplification, and Illumina sequencing**

26  
27 86 DNA was extracted from the pellet of centrifuged (at 14,000 x g for 5 min) swine manure slurry  
28  
29  
30 87 samples (5-ml each) using a PowerSoil DNA isolation kit (MoBio Laboratories, USA). The v3  
31  
32 88 hypervariable region of archaeal 16S rRNA gene was amplified using primer pair S-D-Arch-  
33  
34 89 0349-a-S-17 (5'GYGCASCAGKCGMGAAW3')/ S-D-Arch-0519-a-A-16  
35  
36  
37 90 (5'TTACCGCGGCKGCTG3') (Klindworth et al. 2012). The resulting amplicons were  
38  
39 91 sequenced at the Beijing Genome Institute (BGI) (Hong Kong, China) using Hiseq™ 2500  
40  
41  
42 92 platform (Illumina, USA) to generate 150 bp paired-end reads. The raw sequence data were  
43  
44 93 deposited into the NCBI short reads archive (SRA) database under accession number  
45  
46  
47 94 SRP117664.  
48

49 95  
50  
51  
52 **96 Sequence processing**

53  
54 97 The paired-end sequences were assembled using PANDAseq (Masella et al. 2012), and  
55  
56 98 subsequently processed in Mothur (Schloss et al. 2009). The assembled 16S rRNA gene  
57  
58  
59 99 sequences were aligned against SILVA reference alignment v123 (<http://www.arb-silva.de/>). The  
60

1  
2  
3  
4  
5  
6  
7  
8  
9  
10  
11  
12  
13  
14  
15  
16  
17  
18  
19  
20  
21  
22  
23  
24  
25  
26  
27  
28  
29  
30  
31  
32  
33  
34  
35  
36  
37  
38  
39  
40  
41  
42  
43  
44  
45  
46  
47  
48  
49  
50  
51  
52  
53  
54  
55  
56  
57  
58  
59  
60  
61  
62  
63  
64  
65

100 alignment was screened for chimeric sequences using ‘chimera.uchime’ command implemented  
101 in mothur in de novo mode (Edgar et al. 2011). The resulting alignment was classified against  
102 Greengenes reference taxonomy database (release gg\_13\_8\_99; August 2013). The sequences  
103 were grouped into operational taxonomic units (OTUs) at  $\geq 97\%$  sequence similarity using the  
104 average neighbor clustering algorithm. Singleton OTUs were removed to avoid spurious results  
105 due to sequencing errors. Finally, the dataset was rarified to a depth of 10,291 sequences per  
106 sample using the ‘sub.sample’ command in mothur.

107

**Phylogenetic and statistical analysis**

109 A maximum-likelihood tree was constructed from the sequence alignment of representative  
110 OTUs using FastTree (Price et al. 2010). For evaluating phylogenetic signals, environmental-  
111 optima for all OTUs were calculated by following the procedure described by Stegen et al.  
112 (2012). Then, among-OTU differences in environmental optima were calculated as Euclidean  
113 distances. Mantel correlogram was used to assess the correlation coefficients between differences  
114 in environmental optima and phylogenetic distances with 999 permutations. We calculated mean  
115 nearest taxon distance (MNTD) to emphasize phylogenetic relationships between archaeal OTUs  
116 (Webb et al. 2002). To analyze the turnover in phylogenetic community composition,  $\beta$ MNTD  
117 was calculated using ‘comdistnt’ function (abundance.weighted = TRUE) in ‘picante’ R  
118 package (Kembel et al. 2010). Whereas, Bray-Curtis distance was calculated using ‘vegdist’  
119 function in ‘vegan’ R package (Oksanen et al. 2013) to evaluate the turnover in taxonomic  
120 community composition (at the OTU level). Nonmetric multidimensional scaling (NMDS) plots  
121 were used to visualize the taxonomic and phylogenetic composition of archaeal community

1  
2  
3  
4  
5 122 across all samples. To assess congruence among taxonomic and phylogenetic NMDS ordinations,  
6  
7  
8 123 we used ‘procrustes’ function in vegan R package.  
9

10 124  
11  
12 125 The standardized effect sizes of MNTD (SES.MNTD) was calculated using the null model  
13  
14  
15 126 ‘taxa.labels’ (999 randomization) in ‘picante’ R package to evaluate the phylogenetic community  
16  
17  
18 127 assembly. The mean value of SES.MNTD across all communities deviating significantly from  
19  
20 128 zero indicates clustering (SES.MNTD<0) or over dispersion (SES.MNTD>0) (Webb et al. 2002;  
21  
22 129 Kembel et al. 2010).  
23

24  
25 130  
26  
27 131 Furthermore, a null modeling approach was employed to disentangle the community assembly  
28  
29  
30 132 processes using R software (Stegen et al. 2012; Stegen et al. 2013; Wang et al. 2013). To infer  
31  
32 133 this, the  $\beta$ -nearest taxon index ( $\beta$ NTI) was calculated which estimates the deviation of the  
33  
34  
35 134 observed  $\beta$ MNTD from the null distribution of  $\beta$ MNTD (using 999 randomizations). The  $|\beta$ NTI|  
36  
37 135 values  $> 2$  indicate deterministic selection ( $\beta$ NTI  $< -2$ : homogeneous selection;  $\beta$ NTI  $> +2$ :  
38  
39 136 variable selection) is responsible for differences in community composition, whereas  $|\beta$ NTI|  
40  
41  
42 137 values  $< 2$  indicate that the observed difference in community composition is result of stochastic  
43  
44 138 processes (Dini-Andreote et al. 2015).  
45

46  
47 139  
48  
49 140 **Results and discussion**  
50  
51  
52 141 A total of 122,321 archaeal 16S rRNA gene sequences (with an average length of 191 bp) were  
53  
54 142 obtained from six swine manure slurry samples, with coverage ranging from 10,896 to 26,661  
55  
56 143 reads per sample. Despite the high level of sequencing coverage, the rarefaction curves did not  
57  
58  
59 144 reach a plateau (Fig. 1), indicating that the actual archaeal diversity is much higher. Of the  
60

1  
2  
3  
4  
5 145 122,321 sequences, around 98.8% sequences were classified up to phylum *Euryarchaeota*.  
6  
7  
8 146 *Euryarchaeota* are known to inhabit pig feces and mostly dominated by the methanogenic  
9  
10 147 members of this phylum (Cardinali-Rezende et al. 2012; Da Silva et al. 2014).  
11

12  
13 148  
14  
15 149 Across all samples, *Thermoplasmata* was the most abundant euryarchaeal class (75,127  
16  
17 150 sequences, 61.4% of all sequences) followed by *Methanomicrobia* (22,432 sequences, 18.3% of  
18  
19 all sequences) and *Methanobacteria* (16,226 sequences, 13.3% of all sequences) (Fig. 2). All  
20 151 these archaeal classes have been reported to dominate pig feces (Dridi et al. 2009; Mao et al.  
21  
22 152 2011). The candidate genus *vadinCA11* (Godon et al. 1997) predominated across all samples  
23  
24 153 representing around 56% of the whole archaeal community (Fig.3). The dominance of  
25  
26 154 *vadinCA11* is previously documented in swine manure and storage pits (Whitehead and Cotta  
27  
28 155 1999; Snell-Castro et al. 2005). So far, the metabolic activity of this uncultured archaeal lineage  
29  
30 156 is remains unclear. The other most dominant archaeal genera detected across all samples were  
31  
32 157 *Methanobrevibacter*, *Methanosarcina*, *Methanosphaera*, *Methanogenium*, *Methanocorpusculum*,  
33  
34 158 *Methanoculleus*, and *Methanomicrococcus* (Fig.3). All these genera use hydrogenotrophic  
35  
36 159 methanogenesis pathway except *Methanosarcina*, which can use both the acetoclastic and the  
37  
38 160 hydrogenotrophic methanogenesis pathways (Phelps et al. 1985).  
39  
40  
41  
42  
43  
44  
45  
46  
47  
48

49 163 Testing phylogenetic signal in the ecological niches of species is a prerequisite for making  
50  
51 164 ecological inferences using phylogenetic information (Cavender-Bares et al. 2009; Fine and  
52  
53 165 Kembel 2011). Mantel correlogram showed significant phylogenetic signal across relatively  
54  
55 166 short phylogenetic distances (Fig.4), which indicates that niche preferences of closely related  
56  
57  
58  
59 167 archaeal OTUs are more similar to each other than to the niche preferences of distant relatives  
60  
61  
62  
63  
64  
65



1  
2  
3  
4  
5 168 (Losos 2008). Therefore we calculated MNTD to quantify the phylogenetic distances among  
6  
7  
8 169 close relatives (Webb et al. 2002). This result is consistent with the observation of our previous  
9  
10 170 study on bacterial communities in swine slurries (Kumari et al. 2015), which also found  
11  
12  
13 171 significant phylogenetic signal across relatively short phylogenetic distances. Furthermore,  
14  
15 172 similar results were also reported on archaeal communities in soil ecosystems (Tripathi et al.  
16  
17  
18 173 2015).

19  
20 174  
21  
22 175 Procrustes analysis comparing spatial fit between NMDS plots generated using Bray-Curtis  
23  
24  
25 176 (taxonomic) and  $\beta$ MNTD (phylogenetic) distances showed concordance (procrustes correlation,  
26  
27 177  $R=0.80$ ,  $P=0.04$ ; Fig. 5), indicating that archaeal communities in swine slurry samples have a  
28  
29  
30 178 strong evolutionary structural component. The SES.MNTD distribution mean was significantly  
31  
32 179 less than zero across all samples (Fig. 6a; one-tailed t-test,  $P < 0.05$ ), indicating that the each  
33  
34  
35 180 archaeal community was phylogenetically clustered largely due to environmental filtering.  
36  
37 181 Environmental filtering play a key role in shaping species community assembly (Webb et al.  
38  
39 182 2002). This result is consistent with previous studies on microbial communities in different  
40  
41  
42 183 environments (Kumari et al. 2015; Ren et al. 2015; Yan et al. 2016), which showed that  
43  
44 184 microbial communities had a tendency to be phylogenetically clustered.

45  
46 185  
47  
48  
49 186 To infer the relative influence of deterministic selection vs. stochastic processes that govern the  
50  
51  
52 187 phylogenetic turnover of archaeal communities in swine manure slurry, we employed between-  
53  
54 188 community null modeling approach and calculated  $\beta$ NTI (Stegen et al. 2012; Stegen et al. 2013;  
55  
56 189 Wang et al. 2013). The median of the  $\beta$ NTI distribution was significantly greater than the  
57  
58  
59 190 expected value of zero (median  $\beta$ NTI = +2.00, one-tailed t-test,  $p < 0.0001$ ; Fig. 6b), indicating

1  
2  
3  
4  
5 191 that on average variable selection governs archaeal community dynamics. The physico-  
6  
7  
8 192 chemical properties of swine manure slurry varied widely across samples (Suresh and Choi  
9  
10 193 2011), and this heterogeneous condition among swine manure slurry samples could results in  
11  
12  
13 194 strong influence of variable selection. We also quantified the relative proportions of both  
14  
15 195 ecological processes across all comparisons (Fig. 6b). The results showed that though the  
16  
17  
18 196 relative contribution of deterministic selection was higher (variable selection = 53%),  
19  
20 197 stochastic processes (47%) also appeared to influence the turnover of archaeal communities.  
21  
22 198 These results are consistent with the recent theoretical frameworks that both deterministic  
23  
24  
25 199 selection and stochastic processes govern the assembly of microbial communities (Chase and  
26  
27 200 Myers 2011; Langenheder and Székely 2011; Stegen et al. 2012; Zhou et al. 2014).

## 201 202 **Conclusions**

203 In conclusion, we found that the archaeal community in swine manure slurry was dominated by  
204 methanogenic archaea. The phylogenetic signals detected across relatively short phylogenetic  
205 distances revealed that closely related archaeal OTUs have more similar niche preferences, hence  
206 they are ecologically similar. The archaeal community was phylogenetically clustered within-  
207 community analysis (SES.MNTD) and thus environmental filtering deterministically governs the  
208 assembly of each community in swine manure slurry. However, relative to within-community  
209 analysis, the turnover between archaeal communities ( $\beta$ NTI) was governed by both deterministic  
210 selection and stochastic processes. Overall, this study provides valuable insights into the  
211 community assembly and ecology of archaea in swine manure slurry.

## 212 213 **Acknowledgements**

1  
2  
3  
4  
5  
6  
7  
8  
9  
10  
11  
12  
13  
14  
15  
16  
17  
18  
19  
20  
21  
22  
23  
24  
25  
26  
27  
28  
29  
30  
31  
32  
33  
34  
35  
36  
37  
38  
39  
40  
41  
42  
43  
44  
45  
46  
47  
48  
49  
50  
51  
52  
53  
54  
55  
56  
57  
58  
59  
60  
61  
62  
63  
64  
65

214 This work was supported by Korea Institute of Planning and Evaluation for Technology in Food,  
215 Agriculture, Forestry, and Fisheries (IPET) from the Ministry of Agriculture, Food, and Rural  
216 Affairs (MAFRA) through project no. 312036-03-2-HD030.

218 **References**

219 Auguste JC, Nomokonova N, Camarero L, Casamayor EO (2011) Seasonal changes of freshwater  
220 ammonia-oxidizing archaeal assemblages and nitrogen species in oligotrophic alpine  
221 lakes. *Appl Environ Microbiol* 77:1937–1945

222 Auguste JC, Barberan A, Casamayor EO (2010) Global ecological patterns in uncultured Archaea.  
223 *ISME J* 4:182-190

224 Baas-Becking LGM (1934) *Geobiologie of inleiding tot de milieukunde*. Van Stockum WP &  
225 Zoon NV, The Hague

226 Barker J, Overcash M (2007) Swine waste characterization: a review. *T ASABE* 50:651–657

227 Barret M, Gagnona N, Morissette B, Kalmokoff ML, Stephen ET, Brooks PJ et al. (2015)  
228 Phylogenetic identification of methanogens assimilating acetate-derived carbon in dairy  
229 and swine manures. *Syst Appl Microbiol* 38:56-66

230 Bates ST, Berg-Lyons D, Caporaso JG, Walters WA, Knight R, Fierer N (2011) Examining the  
231 global distribution of dominant archaeal populations in soil. *ISME J* 5:908-917

232 Bintrim SB, Donohue TJ, Handelsman J, Roberts GP, Goodman RM (1997) Molecular  
233 phylogeny of Archaea from soil. *Proc Natl Acad Sci USA* 94:277-282

234 Cardinali-Rezende J, Pereira ZL, Sanz JL, Chartone-Souza E, Nascimento AM (2012) Bacterial  
235 and archaeal phylogenetic diversity associated with swine sludge from an anaerobic  
236 treatment lagoon. *World J Microbiol Biotechnol* 28:3187-3195

1  
2  
3  
4  
5 237 Caruso T, Chan Y, Lacap DC, Lau MC, McKay CP, Pointing SB (2011) Stochastic and  
6  
7  
8 238 deterministic processes interact in the assembly of desert microbial communities on a  
9  
10 239 global scale. *ISME J* 5:1406-1413  
11  
12 240 Cavender-Bares J, Kozak KH, Fine PV, Kembel SW (2009) The merging of community ecology  
13  
14  
15 241 and phylogenetic biology. *Ecol Lett* 12:693-715  
16  
17 242 Chase JM, Myers JA (2011) Disentangling the importance of ecological niches from stochastic  
18  
19  
20 243 processes across scales. *Philos Trans R Soc Lond B Biol Sci* 366:2351-2363  
21  
22 244 Da Silva MLB, Cantão ME, Mezzari MP, Ma J, Nossa CW (2014) Assessment of bacterial and  
23  
24  
25 245 archaeal community structure in swine wastewater treatment processes. *Microbial Ecol*  
26  
27 246 70:77–87  
28  
29  
30 247 Dini-Andreote F, Stegen JC, van Elsas JD, Salles JF (2015) Disentangling mechanisms that  
31  
32 248 mediate the balance between stochastic and deterministic processes in microbial  
33  
34  
35 249 succession. *Proc Natl Acad Sci USA* 112:E1326-E1332  
36  
37 250 Dridi B, Henry M, El Khechine A, Raoult D, Drancourt M (2009) High prevalence of  
38  
39  
40 251 *Methanobrevibacter smithii* and *Methanosphaera stadtmanae* detected in the human gut  
41  
42 252 using an improved DNA detection protocol. *PLoS ONE* 4:e7063  
43  
44 253 Edgar RC, Haas BJ, Clemente JC, Quince C, Knight R (2011) UCHIME improves sensitivity  
45  
46  
47 254 and speed of chimera detection. *Bioinformatics* 27:2194-2200  
48  
49 255 US Environmental Protection Agency (2013) Inventory of US Greenhouse Gas Emissions and  
50  
51  
52 256 Sinks: 1990-2011. EPA Publication 430-R-13-001 (US Environmental Protection Agency,  
53  
54 257 Washington, DC)  
55  
56 258 Fierer N, Jackson RB (2006) The diversity and biogeography of soil bacterial communities. *Proc*  
57  
58  
59 259 *Natl Acad Sci USA* 103:626-631  
60  
61  
62  
63  
64  
65

1  
2  
3  
4  
5 260 Fine PV, Kembel SW (2011) Phylogenetic community structure and phylogenetic turnover  
6  
7  
8 261 across space and edaphic gradients in western Amazonian tree communities. *Ecography*  
9  
10 262 34:552-565  
11  
12 263 Godon J-J, Zumstein E, Dabert P, Habouzit F, Moletta R (1997) Molecular microbial diversity of  
13  
14  
15 264 an anaerobic digester as determined by small-subunit rDNA sequence analysis. *Appl*  
16  
17 265 *Environ Microbiol* 63:2802-2813  
18  
19  
20 266 Kembel SW, Cowan PD, Helmus MR, Cornwell WK, Morlon H, Ackerly DD et al. (2010)  
21  
22 267 *Picante: R tools for integrating phylogenies and ecology. Bioinformatics* 26:1463-1464  
23  
24  
25 268 Klindworth A, Pruesse E, Schweer T, Peplies J, Quast C, Horn M et al. (2012) Evaluation of  
26  
27 269 general 16S ribosomal RNA gene PCR primers for classical and next-generation  
28  
29  
30 270 sequencing-based diversity studies. *Nucleic Acids Res* 41:e1  
31  
32 271 Kumari P, Choi HL, Sudiarto SI (2015) Assessment of bacterial community assembly patterns  
33  
34 272 and processes in pig manure slurry. *PLoS ONE* 10:e0139437  
35  
36  
37 273 Langenheder S, Székely AJ (2011) Species sorting and neutral processes are both important  
38  
39 274 during the initial assembly of bacterial communities. *ISME J* 5:1086-1094  
40  
41  
42 275 Lipp JS, Morono Y, Inagaki F, Hinrichs K-U (2008) Significant contribution of Archaea to  
43  
44 276 extant biomass in marine subsurface sediments. *Nature* 454:991-994  
45  
46  
47 277 Lliros M, Casamayor EO, Borrego C (2008) High archaeal richness in the water column of a  
48  
49 278 freshwater sulfurous karstic lake along an interannual study. *FEMS Microbiol Ecol*  
50  
51 279 66:331-342  
52  
53  
54 280 Losos JB (2008) Phylogenetic niche conservatism, phylogenetic signal and the relationship  
55  
56 281 between phylogenetic relatedness and ecological similarity among species. *Ecol Lett*  
57  
58 282 11:995-1003  
59

1  
2  
3  
4  
5 283 Lozupone CA, Knight R (2007) Global patterns in bacterial diversity Proc Natl Acad Sci USA  
6  
7  
8 284 104:11436-11440  
9  
10 285 Mao SY, Yang CF, Zhu WY (2011) Phylogenetic analysis of methanogens in the pig feces. Curr  
11  
12  
13 286 Microbiol 62:1386-1389  
14  
15 287 Masella AP, Bartram AK, Truszkowski JM, Brown DG, Neufeld JD (2012) PANDAseq: paired-  
16  
17  
18 288 end assembler for illumina sequences. BMC Bioinformatics 13:31  
19  
20 289 Miller TL, Wolin M, Kusel E (1986) Isolation and characterization of methanogens from animal  
21  
22  
23 290 feces. Syst Appl Microbiol 8:234-238  
24  
25 291 Offre P, Spang A, Schleper C (2013) Archaea in biogeochemical cycles. Annu Rev Microbiol  
26  
27  
28 292 67:437-457  
29  
30 293 Okasanen J, Blanchet FG, Kindt R, Legendre P, Minchin PR, O'Hara RB et al. (2013) vegan:  
31  
32 294 Community Ecology Package. R package version 2.0-7. Available at: [http://CRAN.R-](http://CRAN.R-project.org/package=vegan)  
33  
34 295 [project.org/package=vegan](http://CRAN.R-project.org/package=vegan)  
35  
36  
37 296 Peay KG, Garbelotto M, Bruns TD (2010) Evidence of dispersal limitation in soil  
38  
39  
40 297 microorganisms: isolation reduces species richness on mycorrhizal tree islands. Ecology  
41  
42 298 91:3631-3640  
43  
44 299 Pei CX, Mao SY, Cheng YF, Zhu WY (2010) Diversity, abundance and novel 16S rRNA gene  
45  
46  
47 300 sequences of methanogens in rumen liquid, solid and epithelium fractions of Jinnan cattle.  
48  
49 301 Animal 4:20-29  
50  
51  
52 302 Phelps T, Conrad R, Zeikus J (1985) Sulfate-dependent interspecies H<sub>2</sub> transfer between  
53  
54 303 *Methanosarcina barkeri* and *Desulfovibrio vulgaris* during coculture metabolism of  
55  
56 304 acetate or methanol. Appl Environ Microbiol 50:589-594  
57  
58  
59  
60  
61  
62  
63  
64  
65

1  
2  
3  
4  
5 305 Price MN, Dehal PS, Arkin AP (2010) FastTree 2-approximately maximum-likelihood trees for  
6  
7  
8 306 large alignments. PLoS ONE 5:e9490  
9  
10 307 Ren L, Jeppesen E, He D, Wang J, Liboriussen L, Xing P et al. (2015) pH influences the  
11  
12 308 importance of niche-related versus neutral processes in lacustrine bacterioplankton  
13  
14 309 assembly. Appl Environ Microbiol 81:3104-3114  
15  
16  
17 310 Schloss PD, Westcott SL, Ryabin T, Hall JR, Hartmann M, Hollister EB et al. (2009)  
18  
19  
20 311 Introducing mothur: open-source, platform-independent, community-supported software  
21  
22 312 for describing and comparing microbial communities. Appl Environ Microbiol 75:7537-  
23  
24 313 7541  
25  
26  
27 314 Shin EC, Choi BR, Lim WJ, Hong SY, An CL, Cho KM et al. (2004) Phylogenetic analysis of  
28  
29 315 archaea in three fractions of cow rumen based on the 16S rDNA sequence. Anaerobe  
30  
31 316 10:313-319  
32  
33  
34 317 Snell-Castro R, Godon JJ, Delgenès JP, Dabert P (2005) Characterisation of the microbial  
35  
36 318 diversity in a pig manure storage pit using small subunit rDNA sequence analysis. FEMS  
37  
38 319 Microbiol Ecol 52:229-242  
39  
40  
41 320 Stegen JC, Lin X, Fredrickson JK, Chen X, Kennedy DW, Murray C et al. (2013) Quantifying  
42  
43 321 community assembly processes and identifying features that impose them. ISME J  
44  
45 322 7:2069-2079  
46  
47  
48 323 Stegen JC, Lin X, Konopka AE, Fredrickson JK (2012) Stochastic and deterministic assembly  
49  
50 324 processes in subsurface microbial communities. ISME J 6:1653-1664  
51  
52  
53 325 Suresh A, Choi HL (2011) Estimation of nutrients and organic matter in Korean swine slurry  
54  
55 326 using multiple regression analysis of physical and chemical properties. Bioresource  
56  
57 327 Technol 102:8848-8859  
58  
59  
60  
61  
62  
63  
64  
65

1  
2  
3  
4  
5 328 Teske A, Sørensen KB (2008) Uncultured archaea in deep marine subsurface sediments: have we  
6  
7 caught them all? *ISME J* 2:3-18  
8 329  
9  
10 330 Torsvik V, Øvreås L, Thingstad TF (2002) Prokaryotic diversity--magnitude, dynamics, and  
11  
12 controlling factors. *Science* 296:1064-1066  
13 331  
14  
15 332 Tripathi BM, Kim M, Lai-Hoe A, Shukor NAA, Rahim RA, Go R et al. (2013) pH dominates  
16  
17 variation in tropical soil archaeal diversity and community structure. *FEMS Microbiol*  
18 333  
19 *Ecol* 86:303–311  
20 334  
21  
22 335 Tripathi BM, Kim M, Tateno R, Kim W, Wang JJ, Lai-Hoe A et al. (2015) Soil pH and biome  
23  
24 are both key determinants of soil archaeal community structure. *Soil Biol Biochem* 88:1-  
25 336  
26 8  
27 337  
28  
29 338 Wang JJ, Shen J, Wu YC, Tu C, Soininen J, Stegen JC et al. (2013) Phylogenetic beta diversity  
30  
31 in bacterial assemblages across ecosystems: deterministic versus stochastic processes.  
32 339  
33  
34 *ISME J* 7:1310-1321  
35 340  
36  
37 341 Webb CO, Ackerly DD, McPeck MA, Donoghue MJ (2002) Phylogenies and community  
38  
39 ecology. *Annu Rev Ecol Syst* 33:475–505  
40 342  
41  
42 343 Whitehead T, Cotta M (1999) Phylogenetic diversity of methanogenic archaea in swine waste  
43  
44 storage pits. *FEMS Microbiol Lett* 179:223-226  
45 344  
46  
47 345 Whitman WB, Bowen TL, Boone DR (2006) The methanogenic bacteria. *Prokaryotes* 3:165–207  
48  
49 346 Yan Q, Li J, Yu Y, Wang J, He Z, Van Nostrand JD et al. (2016) Environmental filtering  
50  
51 decreases with fish development for the assembly of gut microbiota. *Environ Microbiol*  
52 347  
53 18:4739-4754  
54 348  
55  
56  
57  
58  
59  
60  
61  
62  
63  
64  
65



1  
2  
3  
4  
5  
6  
7  
8  
9  
10  
11  
12  
13  
14  
15  
16  
17  
18  
19  
20  
21  
22  
23  
24  
25  
26  
27  
28  
29  
30  
31  
32  
33  
34  
35  
36  
37  
38  
39  
40  
41  
42  
43  
44  
45  
46  
47  
48  
49  
50  
51  
52  
53  
54  
55  
56  
57  
58  
59  
60  
61  
62  
63  
64  
65

349 Zhou J, Deng Y, Zhang P, Xue K, Liang Y, Nostrand JD et al. (2014) Stochasticity, succession,  
350 and environmental perturbations in a fluidic ecosystem. Proc Natl Acad Sci 111:E836-  
351 E845

1  
2  
3  
4  
5  
6  
7  
8  
9  
10  
11  
12  
13  
14  
15  
16  
17  
18  
19  
20  
21  
22  
23  
24  
25  
26  
27  
28  
29  
30  
31  
32  
33  
34  
35  
36  
37  
38  
39  
40  
41  
42  
43  
44  
45  
46  
47  
48  
49  
50  
51  
52  
53  
54  
55  
56  
57  
58  
59  
60  
61  
62  
63  
64  
65

353 **Figure legends**

354 **Fig. 1.** Rarefaction curves of archaeal operational taxonomic units ( $\geq 97\%$  sequence similarity)  
355 for each sample of swine manure slurry.

356  
357 **Fig. 2.** The relative abundance of dominant archaeal taxa (at class level) present in each sample  
358 of swine manure slurry.

359  
360 **Fig. 3.** Heat map showing the relative abundance (square root transformed) of the most dominant  
361 archaeal genera in each sample of swine manure slurry.

362  
363 **Fig. 4.** Mantel correlogram between differences in environmental optima of OTUs and  
364 phylogenetic distances of archaea in swine manure slurry. Closed squares represent significant  
365 ( $P < 0.05$ ) phylogenetic signals.

366  
367 **Fig. 5.** NMDS ordinations showing the first two axes of (a) taxonomic community  
368 composition based on Bray-Curtis distance; (b) phylogenetic community composition based  
369 on  $\beta$ MNTD and (c) Procrustes analysis comparing taxonomic and phylogentic community  
370 composition of archaea. The arrows in Procrustes analysis point towards the target  
371 configuration (taxonomic community composition), and symbols represent the rotated  
372 configuration (phylogenetic community composition). Correlation and significance values  
373 were calculated using the ‘protest’ function in vegan R package.

374

1  
2  
3  
4  
5  
6  
7  
8  
9  
10  
11  
12  
13  
14  
15  
16  
17  
18  
19  
20  
21  
22  
23  
24  
25  
26  
27  
28  
29  
30  
31  
32  
33  
34  
35  
36  
37  
38  
39  
40  
41  
42  
43  
44  
45  
46  
47  
48  
49  
50  
51  
52  
53  
54  
55  
56  
57  
58  
59  
60  
61  
62  
63  
64  
65

375 **Fig. 6.** (a) Box plot showing variation in SES.MNTD values across all samples. The  
376 SES.MNTD distribution mean was significantly less than zero (one-tailed t-test,  $P < 0.05$ ). (b)  
377 Frequency estimates for distributions of  $\beta$ NTI. The median of the  $\beta$ NTI distribution was  
378 significantly different from expected value of zero (one-tailed t-test,  $P < 0.0001$ ).  
379

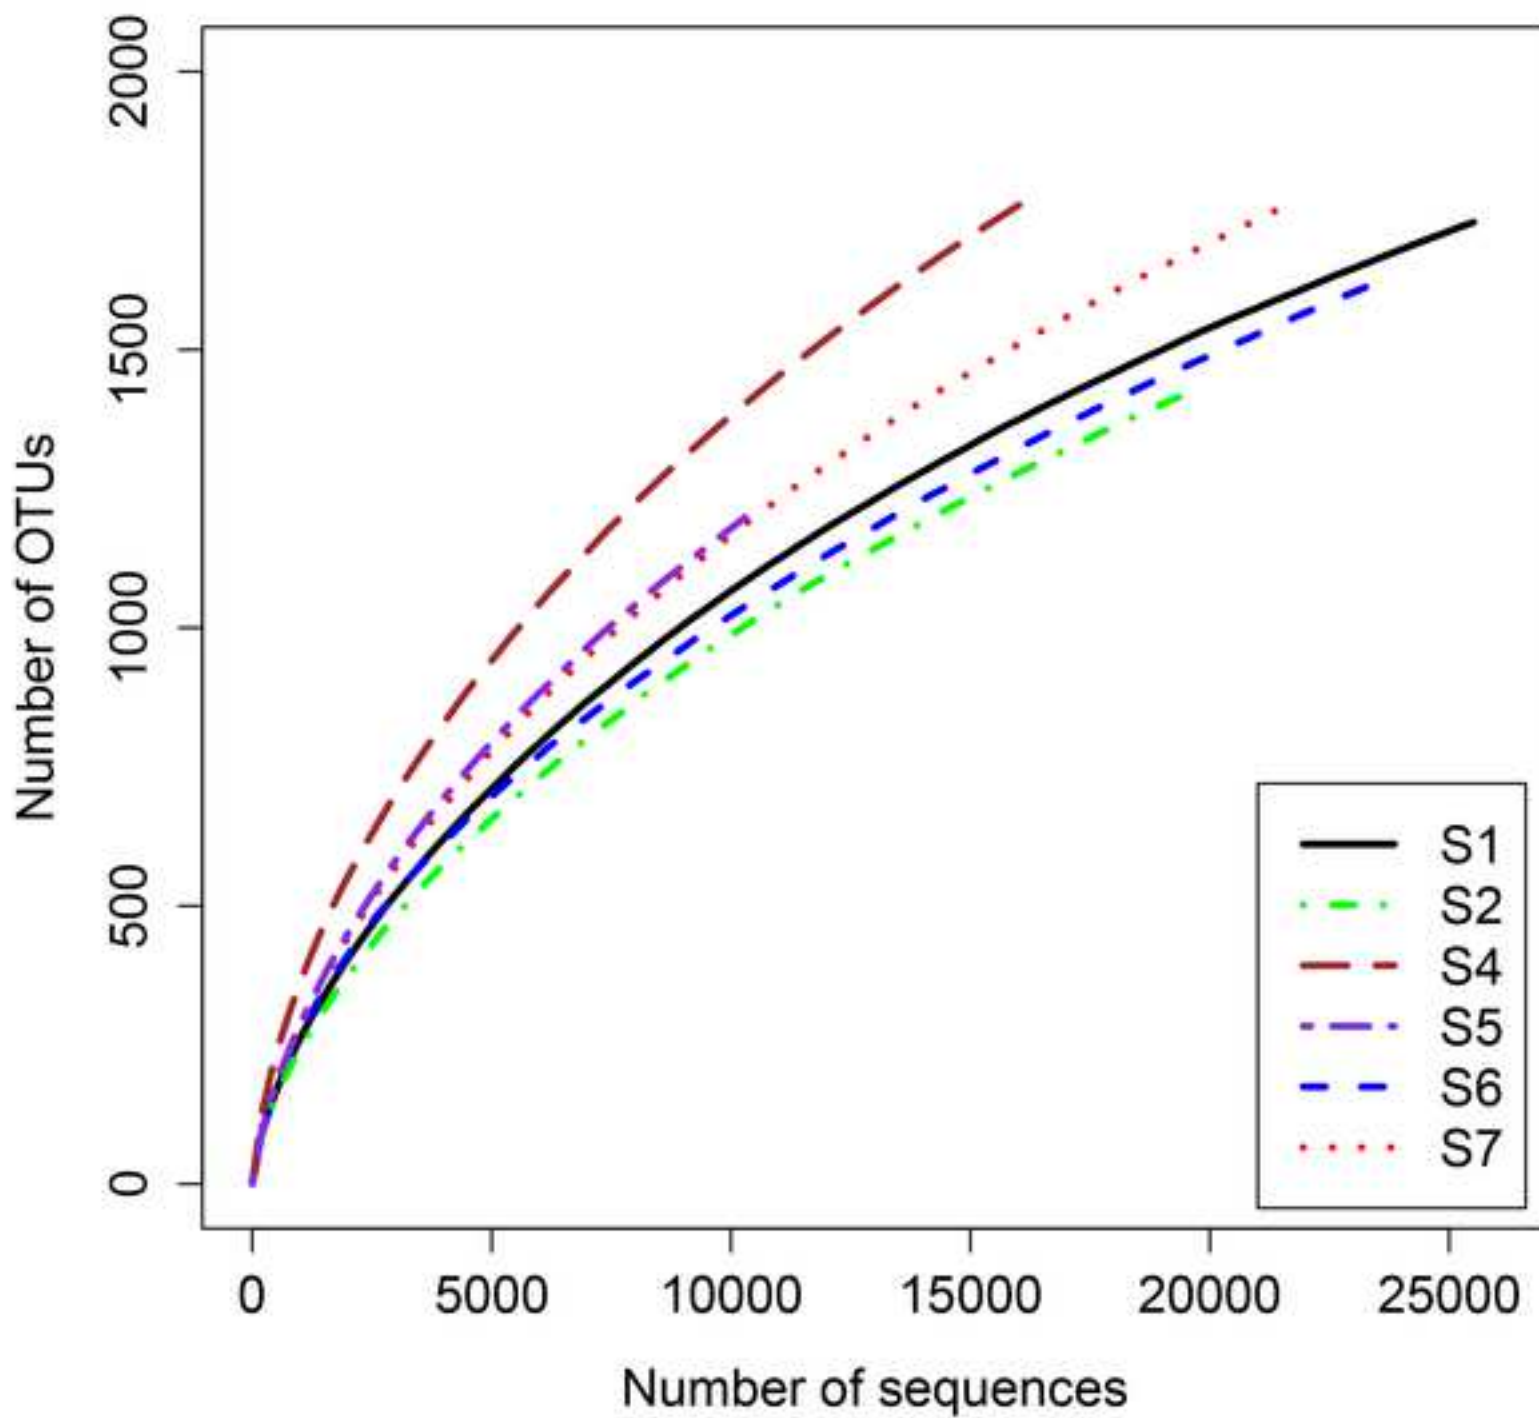

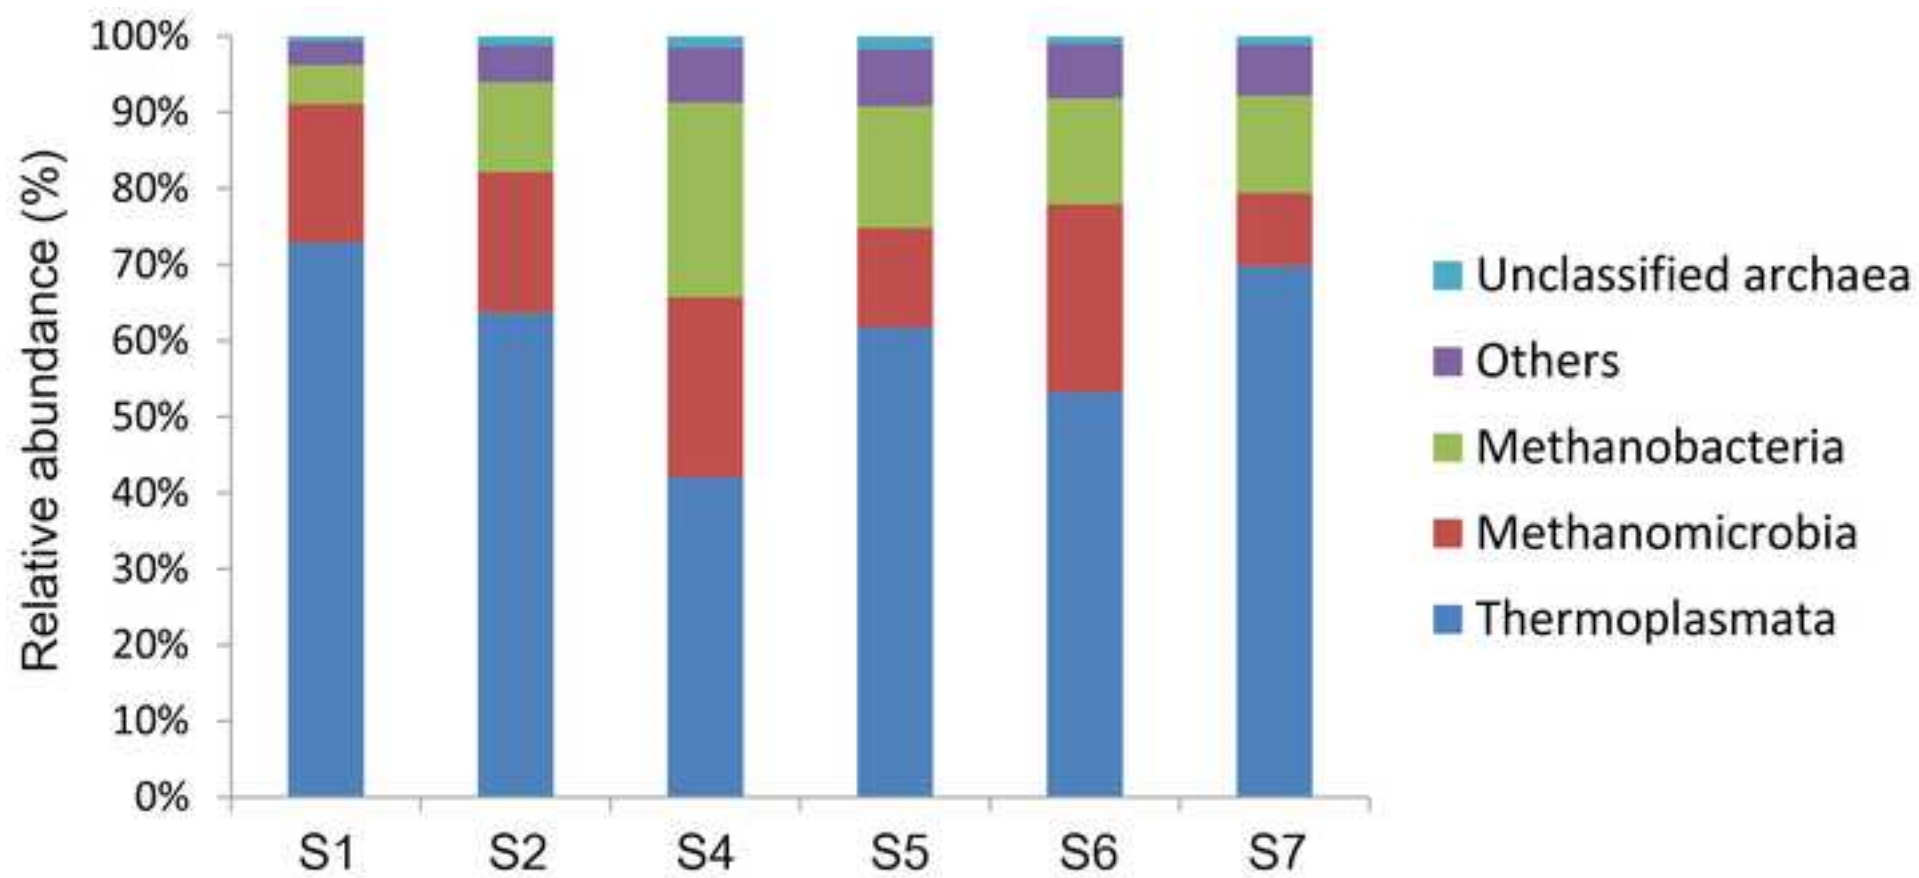

Fig.3

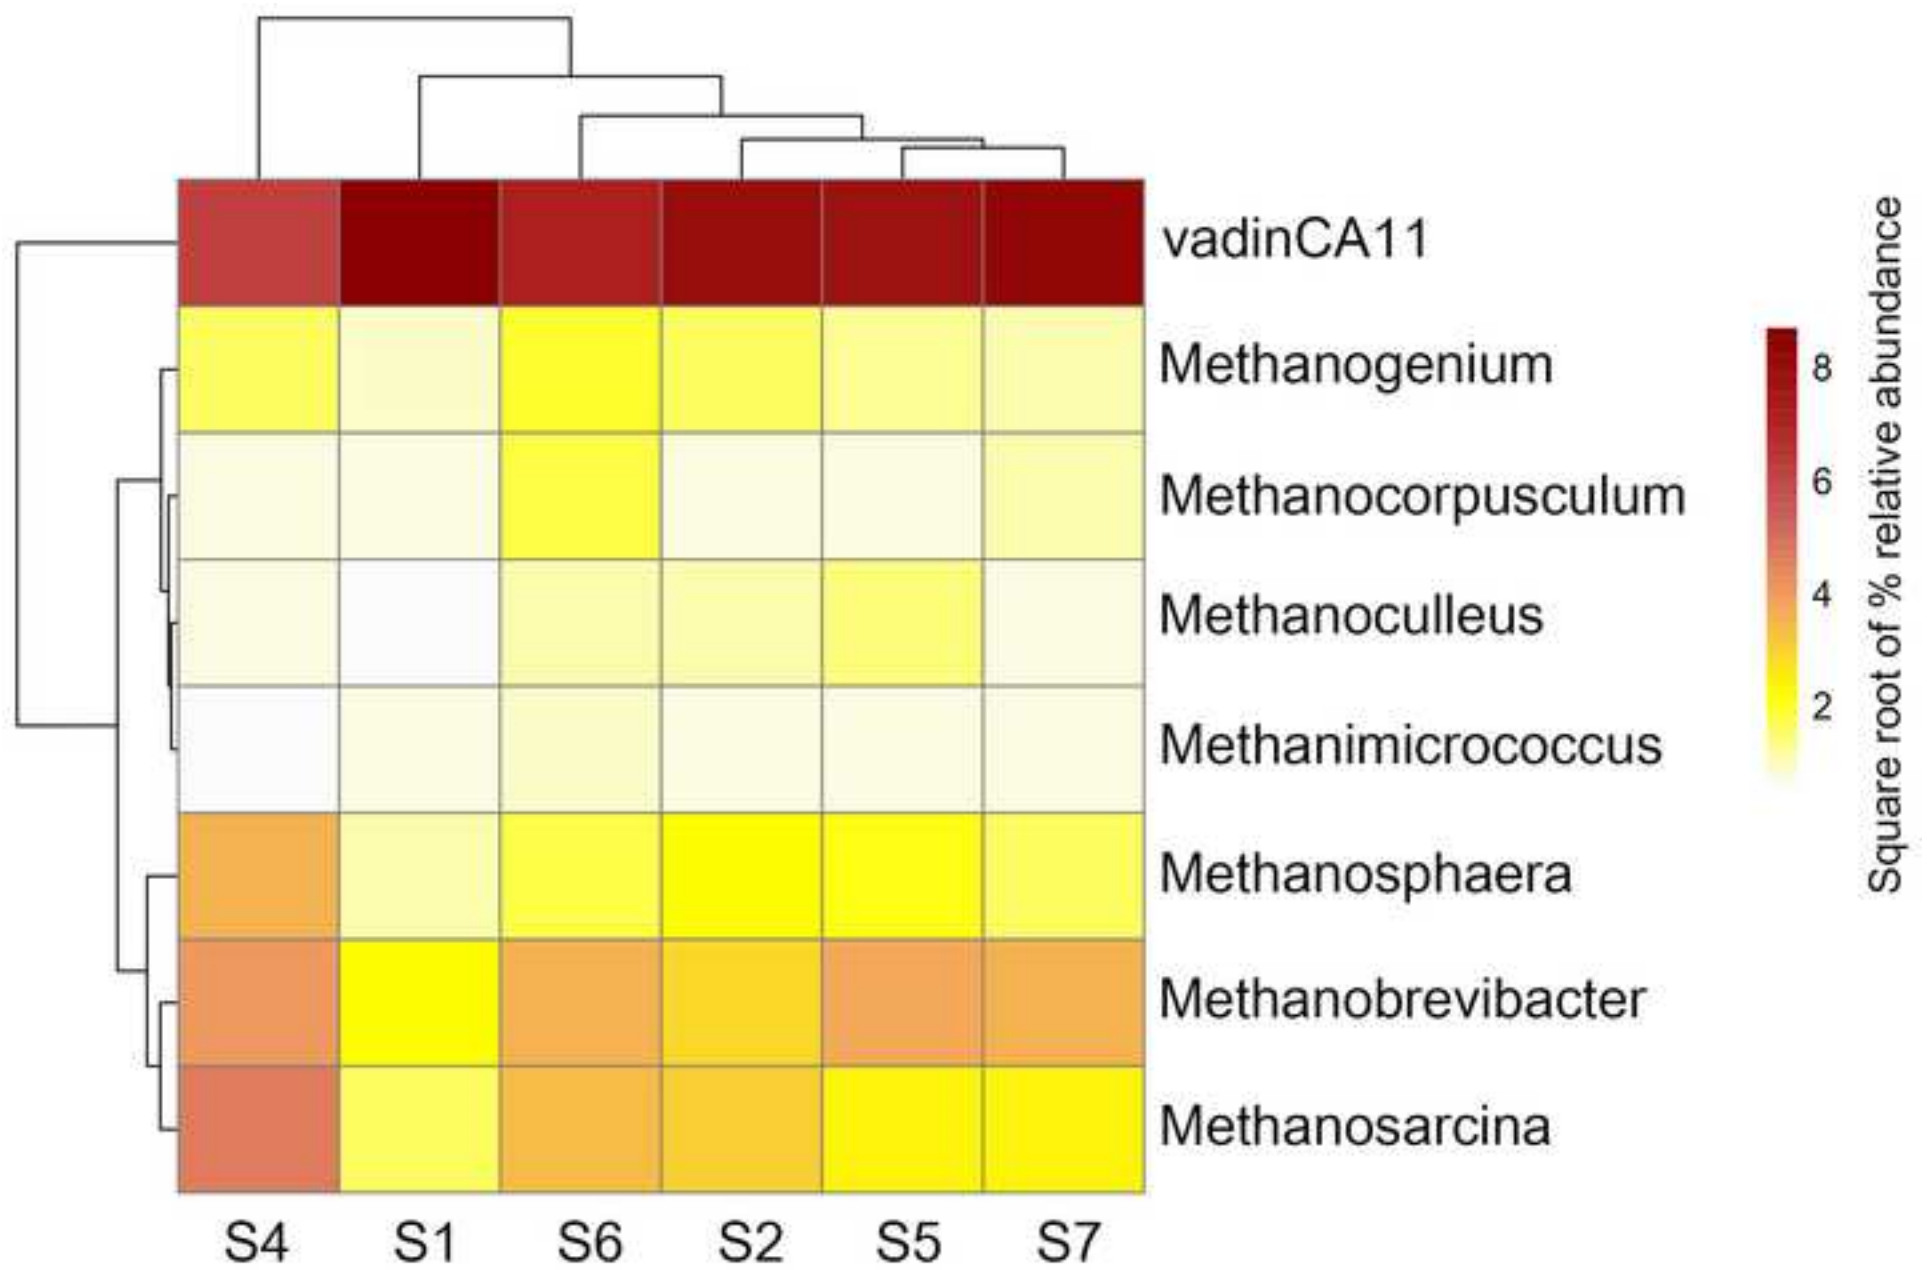

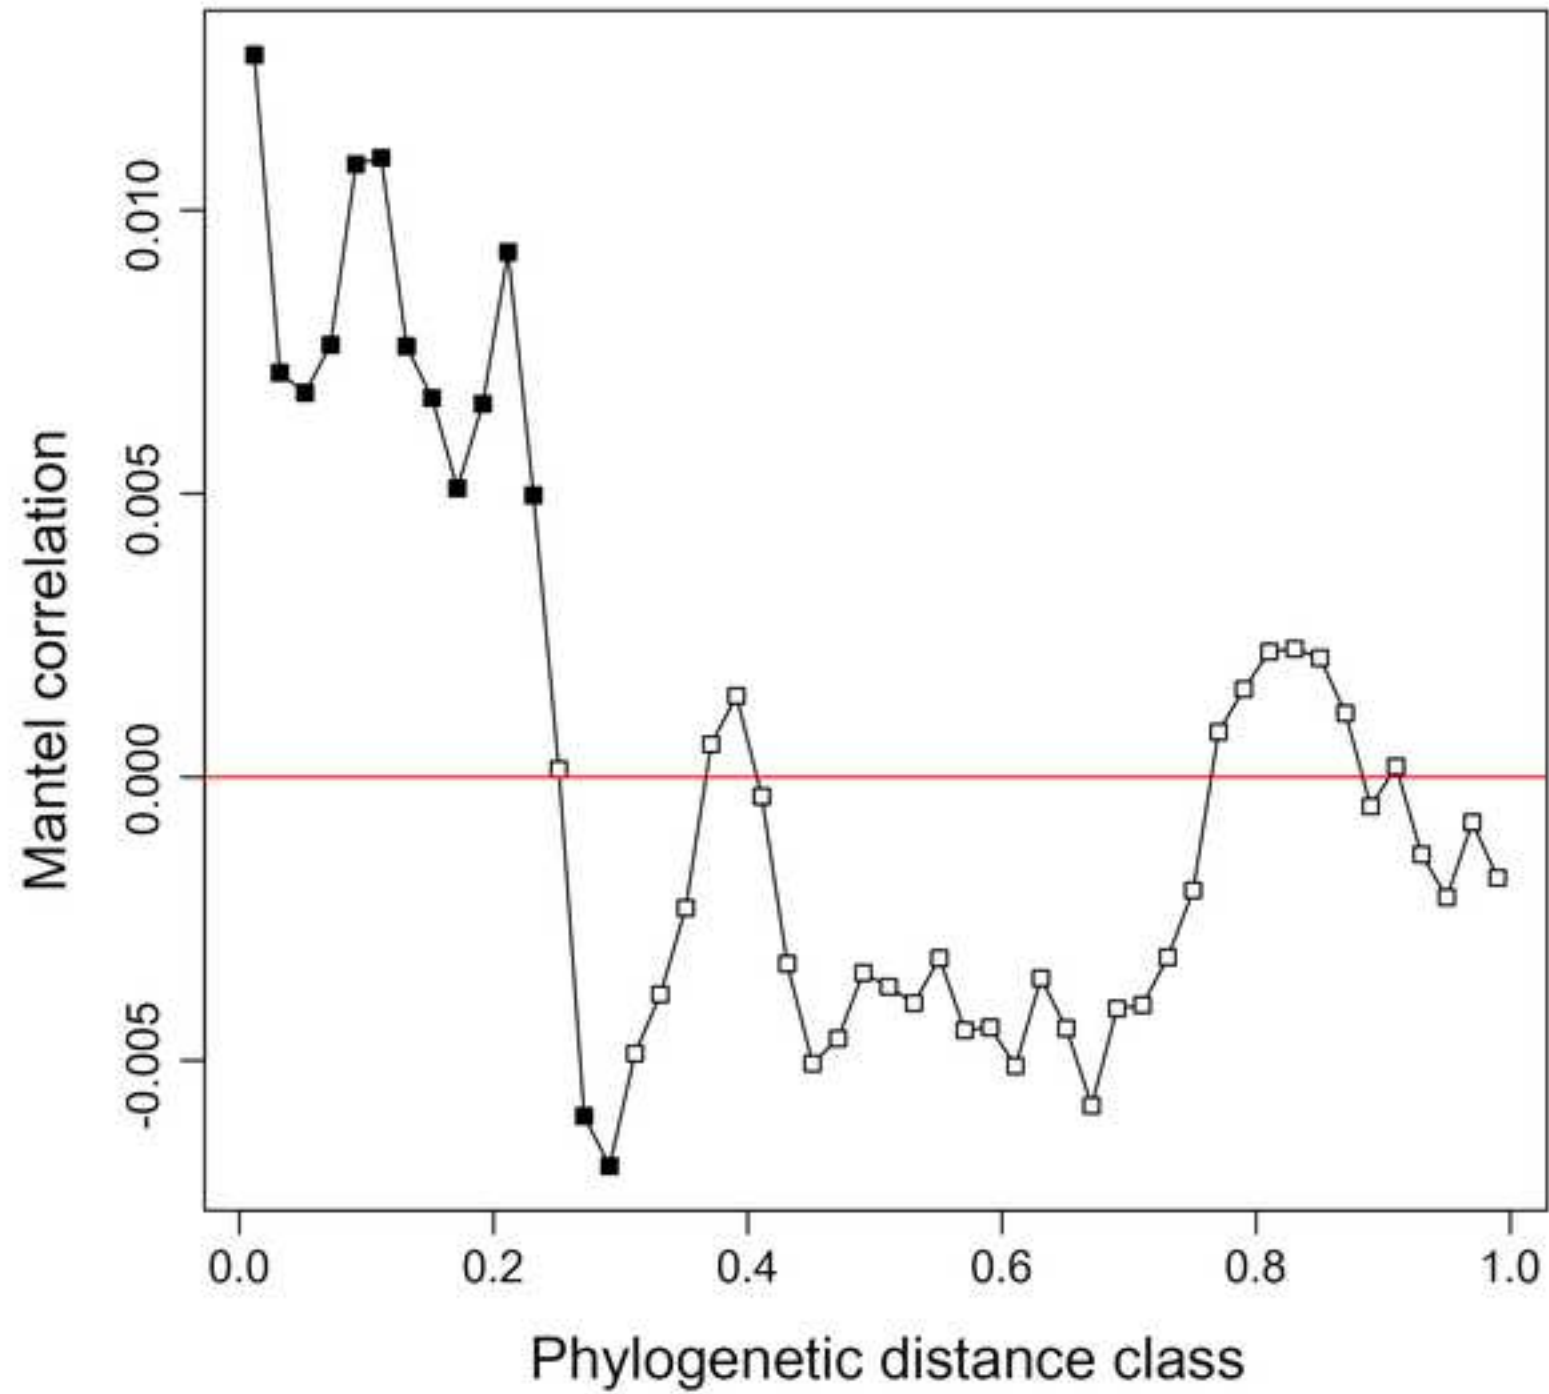

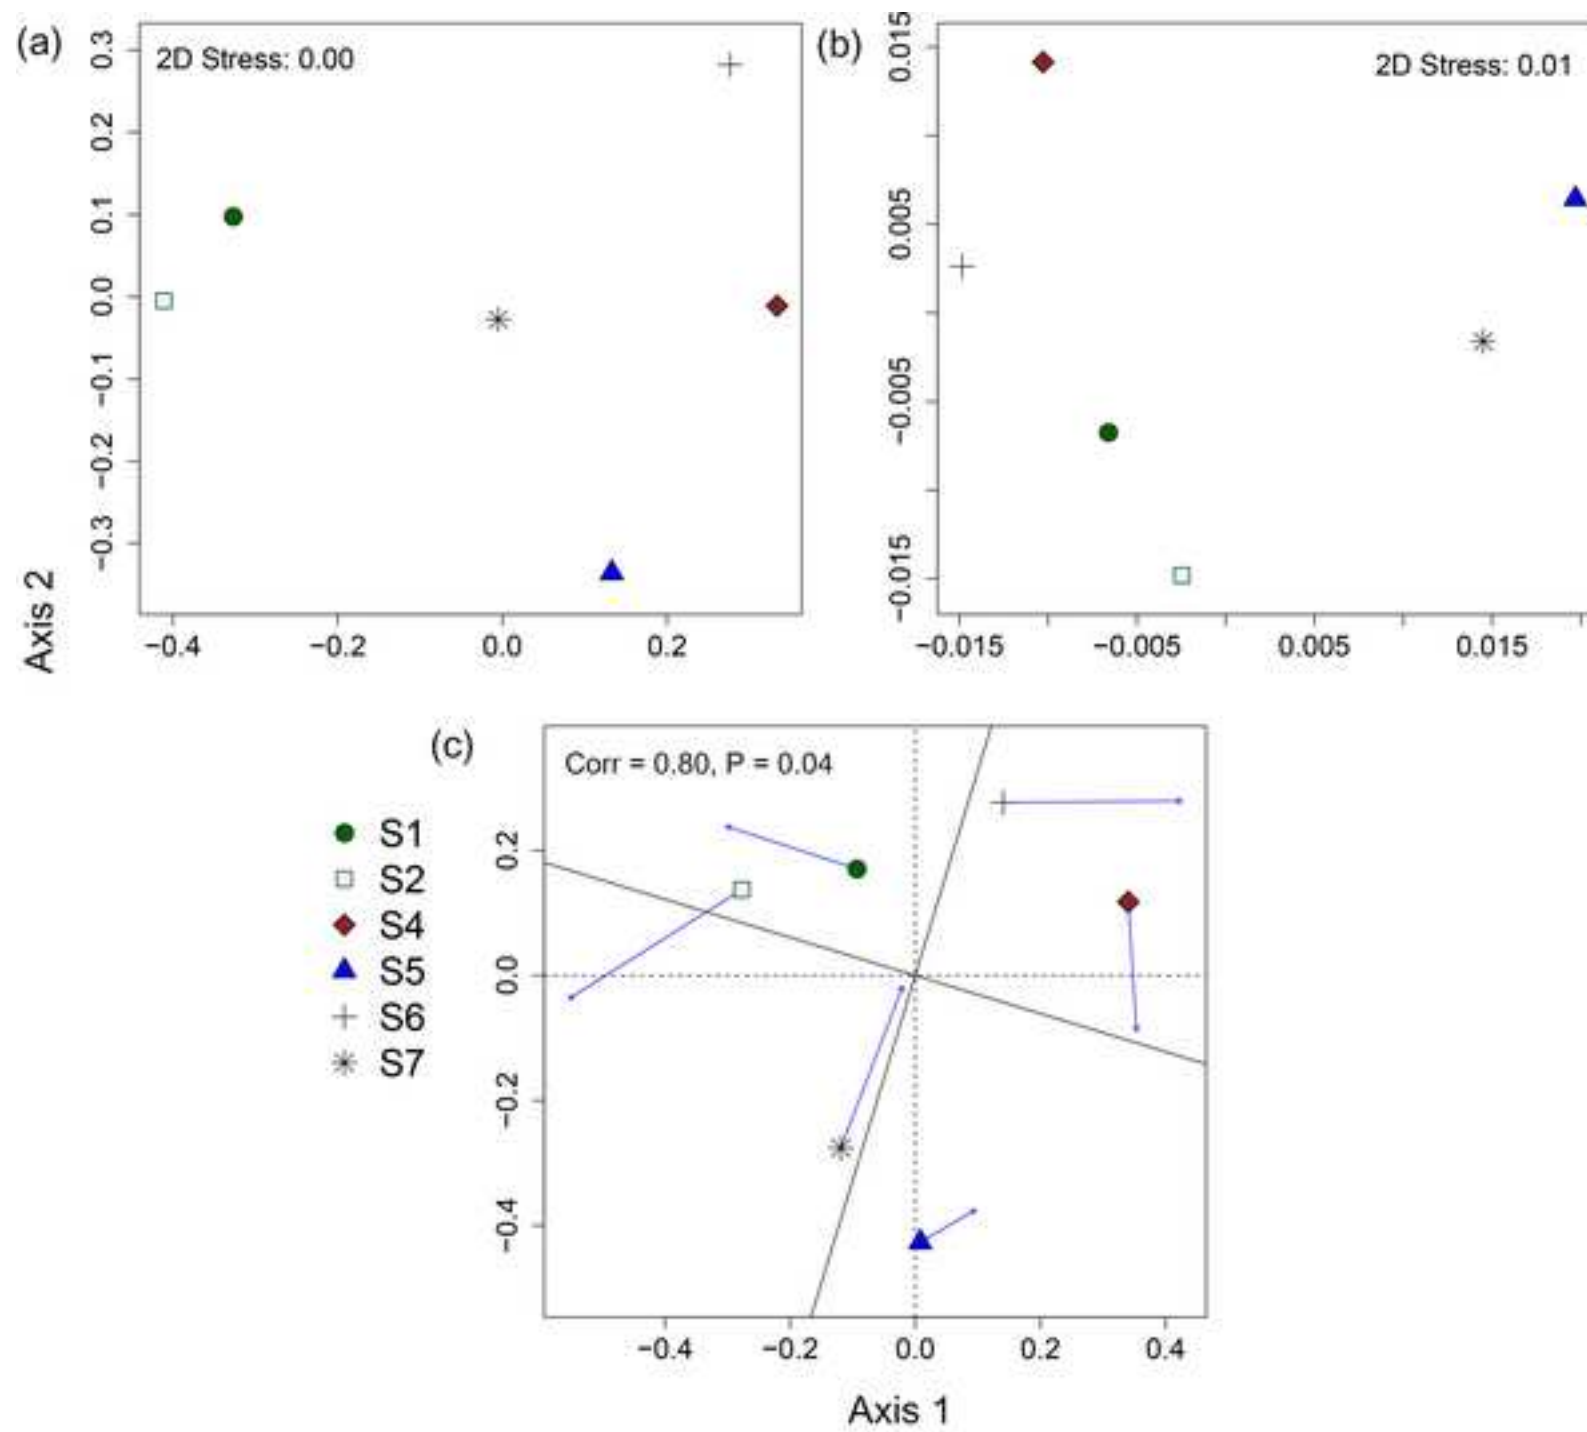



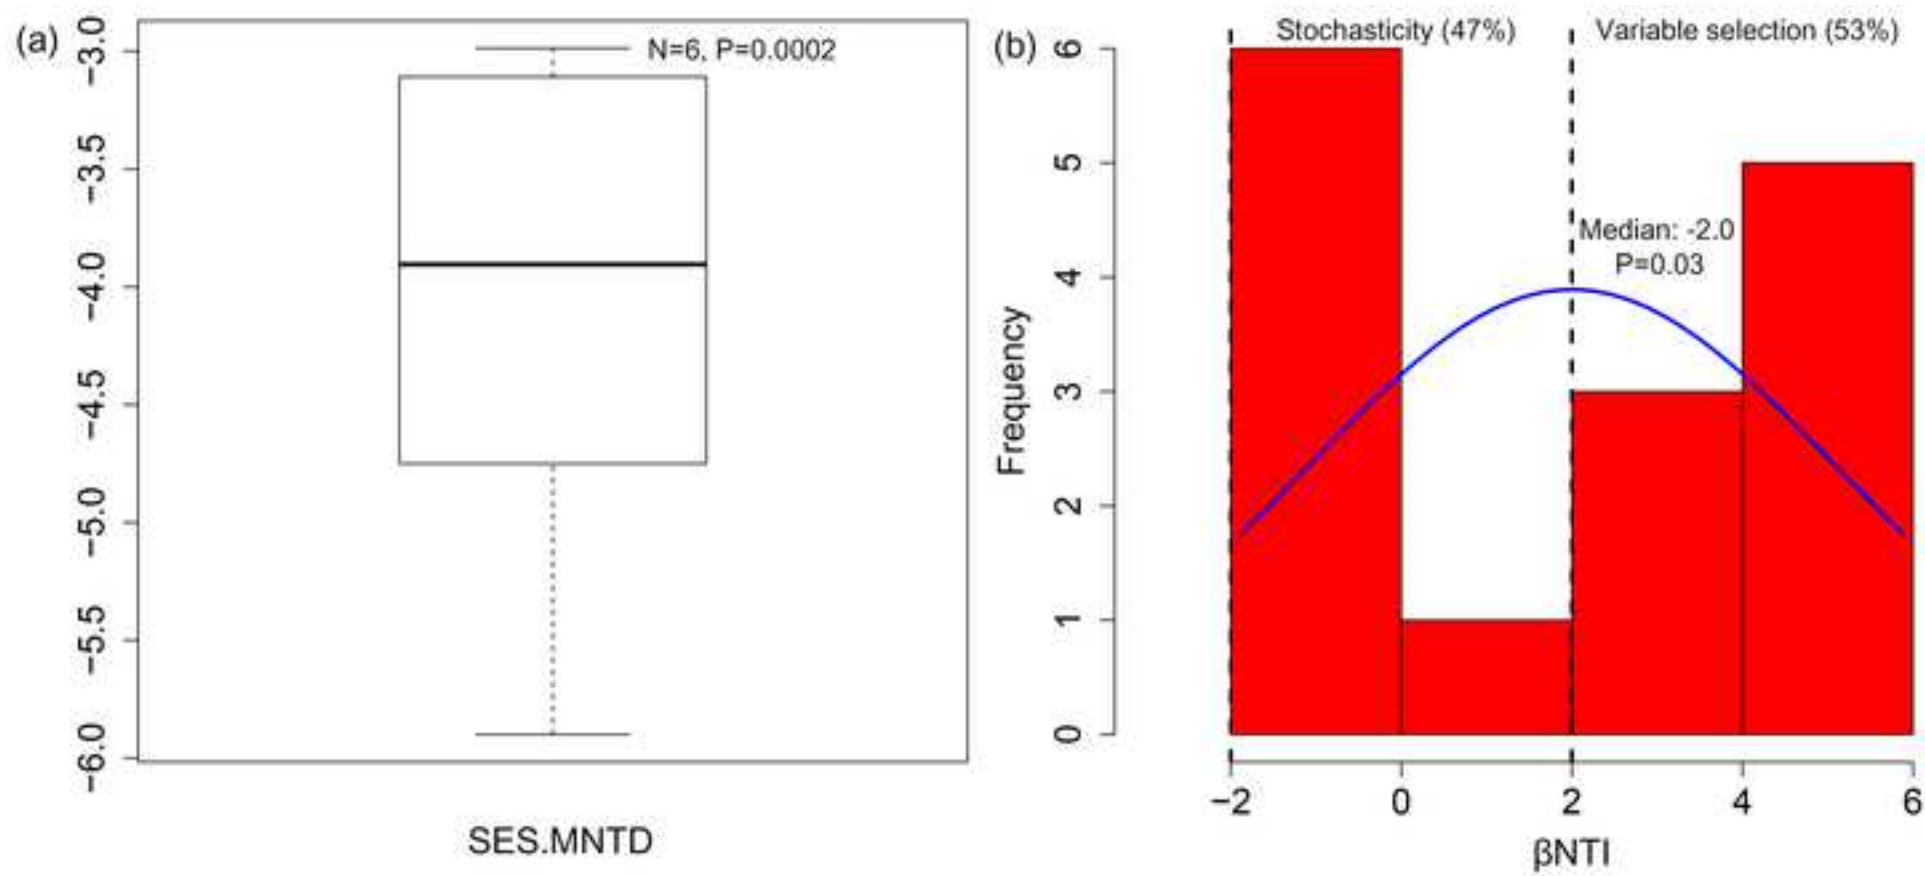

Source: http://biorxiv.org/content/10.1101/233445v1.full.pdf
